# Supplementary material for: Structural basis for antigen recognition by methylated lysine–specific antibodies
Source: PubMed Central journal article supplement (PMC7948472; doi:10.1074/jbc.ra120.015996), 2020-12-17
Supplement: mmc1.pdf [file mmc1.pdf]

**Table S1: Absorbance value of ELISA using phage-Fab for selected clones**

| <b>Clone</b> | <b>Methylated peptide</b> | <b>Non-methylated peptide</b> |
|--------------|---------------------------|-------------------------------|
| <b>E10</b>   | <b>4</b>                  | <b>0.111</b>                  |
| <b>F9</b>    | <b>1.762</b>              | <b>0.103</b>                  |
| <b>C9</b>    | <b>4</b>                  | <b>0.057</b>                  |
| <b>E7</b>    | <b>4</b>                  | <b>0.065</b>                  |
| <b>E6</b>    | <b>4</b>                  | <b>0.119</b>                  |
| <b>D6</b>    | <b>4</b>                  | <b>0.063</b>                  |

**Table S2: kinetics parameters of Fab / peptides interaction**

| Clone |                        | $K_D$ (M)                     | $k_{on}$ ( $M^{-1}s^{-1}$ ) | $k_{off}$ ( $s^{-1}$ )       | Specificity Ratio*<br>( $K_D$ Non-me/ $K_D$ Me) |
|-------|------------------------|-------------------------------|-----------------------------|------------------------------|-------------------------------------------------|
| E10   | Methylated peptide     | $3.7 \pm 0.2 \times 10^{-5}$  | N.D                         | N.D.                         | 1.1                                             |
|       | Non-methylated peptide | $4.0 \pm 0.4 \times 10^{-5}$  | N.D                         | N.D.                         |                                                 |
| F9    | Methylated peptide     | $3.0 \pm 0.1 \times 10^{-7}$  | $3.3 \pm 0.4 \times 10^5$   | $9.8 \pm 1.5 \times 10^{-2}$ | 13.3                                            |
|       | Non-methylated peptide | $4.0 \pm 0.7 \times 10^{-6}$  | $8.6 \pm 2.4 \times 10^4$   | $0.33 \pm 0.04$              |                                                 |
| C9    | Methylated peptide     | $1.4 \pm 0.3 \times 10^{-8}$  | $4.8 \pm 0.4 \times 10^5$   | $6.0 \pm 0.6 \times 10^{-3}$ | 31428                                           |
|       | Non-methylated peptide | $4.4 \pm 2.5 \times 10^{-4}$  | N.D                         | N.D.                         |                                                 |
| E7    | Methylated peptide     | N.D                           | N.D                         | N.D.                         | N.D.                                            |
|       | Non-methylated peptide | N.D                           | N.D                         | N.D.                         |                                                 |
| E6    | Methylated peptide     | $9.0 \pm 1.6 \times 10^{-10}$ | $3.4 \pm 1.2 \times 10^6$   | $2.9 \pm 0.6 \times 10^{-3}$ | 389                                             |
|       | Non-methylated peptide | $3.5 \pm 0.2 \times 10^{-7}$  | $5.0 \pm 0.4 \times 10^5$   | $0.18 \pm 0.01$              |                                                 |
| D6    | Methylated peptide     | $5.4 \pm 0.4 \times 10^{-8}$  | $1.9 \pm 1.1 \times 10^6$   | $9.6 \pm 5.2 \times 10^{-2}$ | 2593                                            |
|       | Non-methylated peptide | $1.4 \pm 0.4 \times 10^{-4}$  | N.D                         | N.D.                         |                                                 |

**\*The specificity ratio represents the fold difference between affinity for the non-methylated vs. methylated peptide, with a higher ratio corresponding to a more methyl-specific clone**

**Table S3 Binding affinity of Fab / peptide with different methylation state**

| Clone | $K_D$ (M)                     |                              |                              |                              |
|-------|-------------------------------|------------------------------|------------------------------|------------------------------|
|       | Trimethyl                     | Dimethyl                     | Monomethyl                   | Non-methyl                   |
| F9    | $3.0 \pm 0.1 \times 10^{-7}$  | $6.9 \pm 1.6 \times 10^{-7}$ | $2.2 \pm 0.6 \times 10^{-6}$ | $4.0 \pm 0.7 \times 10^{-6}$ |
| C9    | $1.4 \pm 0.3 \times 10^{-8}$  | $8.4 \pm 2.5 \times 10^{-8}$ | $2.3 \pm 1.0 \times 10^{-5}$ | $4.4 \pm 2.5 \times 10^{-4}$ |
| E6    | $9.0 \pm 1.6 \times 10^{-10}$ | $8.4 \pm 1.4 \times 10^{-9}$ | $3.6 \pm 0.4 \times 10^{-8}$ | $3.5 \pm 0.2 \times 10^{-7}$ |
| D6    | $5.4 \pm 0.4 \times 10^{-8}$  | $2.3 \pm 0.1 \times 10^{-7}$ | $2.5 \pm 0.3 \times 10^{-5}$ | $1.4 \pm 0.4 \times 10^{-4}$ |

**Table S4: Data collection and refinement statistics.**

Statistical values given in parenthesis refer to the highest resolution bin.

| <b>Data Collection</b>            | <b>C9 + peptide</b>    | <b>D6 + peptide</b>    | <b>E6 + peptide</b>               | <b>F9 + peptide</b>               |
|-----------------------------------|------------------------|------------------------|-----------------------------------|-----------------------------------|
| Beamline                          | Spring 8 BL-26B2       | PF BL-5A               | PF BL-1A                          | Spring 8 BL-26B2                  |
| Space Group                       | P 1                    | P 1                    | P 4 <sub>1</sub> 2 <sub>1</sub> 2 | P 2 2 <sub>1</sub> 2 <sub>1</sub> |
| Unit cell                         |                        |                        |                                   |                                   |
| a, b, c (Å)                       | 39.31, 75.68,<br>76.32 | 41.52, 76.21,<br>79.21 | 82.33, 82.33,<br>120.27           | 49.76, 65.53,<br>125.86           |
| $\alpha$ , $\beta$ , $\gamma$ (°) | 74.0, 87.2, 84.8       | 85.6, 84.2, 76.0       | 90.0, 90.0, 90.0                  | 90.0, 90.0, 90.0                  |
| Resolution (Å)                    | 45.7 - 1.60            | 40.2 - 1.77            | 67.9 - 1.80                       | 46.3 - 1.90                       |
| Wavelength                        | 1.0000                 | 1.0000                 | 1.0000                            | 1.0000                            |
| Observations                      | 210,965 (30,305)       | 290,437 (41,524)       | 903,851 (74,644)                  | 457,980 (21,635)                  |
| Unique reflections                | 106,948 (15,357)       | 88,438 (12,726)        | 39,032 (5,534)                    | 31,867 (1,856)                    |
| $R_{merge}$                       | 0.040 (0.346)          | 0.087 (0.517)          | 0.092 (0.468)                     | 0.193 (1.28)                      |
| $R_{p.i.m.}$                      | 0.040 (0.346)          | 0.056 (0.335)          | 0.019 (0.131)                     | 0.052 (0.379)                     |
| CC <sub>1/2</sub>                 | 0.994 (0.810)          | 0.993 (0.825)          | 0.999 (0.875)                     | 0.997 (0.677)                     |
| $I / \sigma(I)$                   | 8.4 (2.1)              | 8.4 (2.1)              | 23.3 (5.6)                        | 14.1 (2.2)                        |
| Multiplicity                      | 2.0 (2.0)              | 3.3 (3.3)              | 23.2 (13.5)                       | 14.4 (11.7)                       |
| Completeness (%)                  | 96.3 (94.7)            | 96.9 (95.3)            | 99.9 (99.1)                       | 99.2 (90.2)                       |
| <b>Refinement Statistics</b>      |                        |                        |                                   |                                   |
| Resolution (Å)                    | 45.7 - 1.60            | 40.2 - 1.77            | 67.9 - 1.80                       | 46.3 - 1.90                       |
| $R_{work} / R_{free}$ (%)         | 17.2 / 23.5            | 18.5 / 21.8            | 17.0 / 21.7                       | 17.9 / 22.9                       |
| No. complexes                     | 2                      | 2                      | 1                                 | 1                                 |
| No. atoms                         |                        |                        |                                   |                                   |
| Protein                           | 6,399                  | 6,365                  | 3,200                             | 3,109                             |
| Peptide                           | 144                    | 151                    | 55                                | 51                                |
| Other                             | 3                      | 12                     | 1                                 | 11                                |
| Water                             | 691                    | 737                    | 331                               | 378                               |
| B-factor (Å <sup>2</sup> )        |                        |                        |                                   |                                   |
| Protein                           | 29.3                   | 27.4                   | 23.8                              | 21.3                              |
| Peptide                           | 40.9                   | 37.7                   | 25.2                              | 27.7                              |
| Others                            | 32.1                   | 32.1                   | 31.6                              | 39.1                              |
| Water                             | 33.6                   | 31.4                   | 27.5                              | 25.1                              |
| Ramachandran                      |                        |                        |                                   |                                   |
| Plot                              |                        |                        |                                   |                                   |
| Preferred (%)                     | 90.9                   | 90.7                   | 90.5                              | 90.8                              |
| Allowed (%)                       | 8.8                    | 9.1                    | 9.2                               | 8.9                               |
| Outliers (%)                      | 0.3                    | 0.3                    | 0.3                               | 0.3                               |
| RMSD Bond (Å)                     | 0.010                  | 0.012                  | 0.014                             | 0.008                             |
| RMSD Angle (°)                    | 1.58                   | 1.73                   | 1.86                              | 1.53                              |
| PDB entry code                    | 6LDW                   | 6LDY                   | 6LDX                              | 6LDV                              |
