# Supplementary material for: Structural basis for antigen recognition by methylated lysine–specific antibodies
Source: PubMed Central journal article supplement (PMC7948472; doi:10.1074/jbc.ra120.015996), 2020-12-17
Supplement: mmc2.pdf [file mmc2.pdf]

F9

VH vs peptide

### Hydrogen bonds XML

| ## | _Structure 1_  | _Dist. [Å] | _Structure 2_   |
|----|----------------|------------|-----------------|
| 1  | P:THR 12[ N ]  | 3.75       | H:SER 30[ O ]   |
| 2  | P:THR 12[ N ]  | 3.01       | H:ASN 31[ OD1]  |
| 3  | P:THR 12[ OG1] | 3.57       | H:ASN 31[ OD1]  |
| 4  | P:GLY 8[ O ]   | 2.96       | H:THR 52[ N ]   |
| 5  | P:GLY 8[ O ]   | 3.45       | H:THR 52[ OG1]  |
| 6  | P:M3L 9[ O ]   | 2.89       | H:HIS 95[ ND1]  |
| 7  | P:GLY 10[ O ]  | 3.01       | H:ALA 32[ N ]   |
| 8  | P:THR 12[ OG1] | 3.72       | H:ASN 31[ ND2]  |
| 9  | P:TYR 13[ O ]  | 2.93       | H:TYR 97[ N ]   |
| 10 | P:TYR 13[ O ]  | 3.33       | H:ASN 102[ ND2] |
| 11 | P:PRO 14[ O ]  | 3.71       | H:TYR 97[ N ]   |
| 12 | P:PRO 14[ O ]  | 3.51       | H:THR 98[ N ]   |
| 13 | P:PRO 14[ O ]  | 2.39       | H:THR 98[ OG1]  |
| 14 | P:PRO 14[ OXT] | 2.94       | H:ASN 102[ ND2] |

No disulfide bonds found

No covalent bonds found

No salt bridges found

VL vs peptide

### Hydrogen bonds XML

| ## | _Structure 1_  | _Dist. [Å] | _Structure 2_  |
|----|----------------|------------|----------------|
| 1  | P:PRO 14[ O ]  | 2.95       | L:ARG 48[ NH1] |
| 2  | P:PRO 14[ OXT] | 2.83       | L:ARG 48[ NH2] |
| 3  | P:PRO 14[ OXT] | 3.14       | L:ARG 48[ NH1] |

### Salt bridges XML

| ## | _Structure 1_  | _Dist. [Å] | _Structure 2_  |
|----|----------------|------------|----------------|
| 1  | P:PRO 14[ O ]  | 3.88       | L:ARG 48[ NH2] |
| 2  | P:PRO 14[ O ]  | 2.95       | L:ARG 48[ NH1] |
| 3  | P:PRO 14[ OXT] | 2.83       | L:ARG 48[ NH2] |
| 4  | P:PRO 14[ OXT] | 3.14       | L:ARG 48[ NH1] |

No disulfide bonds found

No covalent bonds found

C9

VH vs peptide

**Hydrogen bonds** XML

| <b>Hydrogen bonds</b> |                |             |                  | XML | No disulfide bonds found |
|-----------------------|----------------|-------------|------------------|-----|--------------------------|
| ##                    | _Structure 1_  | _Dist. [Å]_ | _Structure 2_    |     | No covalent bonds found  |
| 1                     | C:GLY 10 [ N ] | 3.42        | H:SER 97 [ OG ]  |     | No salt bridges found    |
| 2                     | C:GLY 11 [ N ] | 3.09        | H:SER 97 [ OG ]  |     |                          |
| 3                     | C:GLY 8 [ O ]  | 2.63        | H:SER 51 [ OG ]  |     |                          |
| 4                     | C:GLY 8 [ O ]  | 3.23        | H:THR 53 [ OG1 ] |     |                          |

VL vs peptide

| <b>Hydrogen bonds</b> |               |             |                  | XML |
|-----------------------|---------------|-------------|------------------|-----|
| ##                    | _Structure 1_ | _Dist. [Å]_ | _Structure 2_    |     |
| 1                     | C:GLY 8 [ N ] | 2.72        | L:ASN 97 [ OD1 ] |     |
| 2                     | C:GLU 5 [ O ] | 3.82        | L:ASN 97 [ ND2 ] |     |
| 3                     | C:LYS 6 [ O ] | 3.10        | L:ASN 97 [ ND2 ] |     |

No disulfide bonds found

No covalent bonds found

No salt bridges found

E6

VH vs peptide

### Hydrogen bonds XML

| ## | _Structure 1_  | _Dist. [Å] | _Structure 2_   |
|----|----------------|------------|-----------------|
| 1  | B:THR 12[ N ]  | 3.81       | H:ASN 30[ O ]   |
| 2  | B:THR 12[ N ]  | 2.89       | H:ASN 31[ OD1]  |
| 3  | B:THR 12[ OG1] | 3.22       | H:ASN 31[ OD1]  |
| 4  | B:GLY 8[ O ]   | 2.85       | H:THR 52[ N ]   |
| 5  | B:GLY 8[ O ]   | 3.45       | H:THR 52[ OG1]  |
| 6  | B:GLY 10[ O ]  | 2.86       | H:ALA 32[ N ]   |
| 7  | B:GLY 11[ O ]  | 3.84       | H:TYR 97[ N ]   |
| 8  | B:TYR 13[ OH ] | 2.77       | H:GLN 1[ NE2]   |
| 9  | B:TYR 13[ O ]  | 2.86       | H:TYR 97[ N ]   |
| 10 | B:TYR 13[ O ]  | 3.39       | H:ASN 102[ ND2] |
| 11 | B:PRO 14[ O ]  | 3.21       | H:THR 98[ N ]   |
| 12 | B:PRO 14[ O ]  | 2.52       | H:THR 98[ OG1]  |
| 13 | B:PRO 14[ O ]  | 3.53       | H:TYR 97[ N ]   |
| 14 | B:PRO 14[ OXT] | 2.95       | H:ASN 102[ ND2] |

No disulfide bonds found

No covalent bonds found

No salt bridges found

VL vs peptide

### Hydrogen bonds XML

| ## | _Structure 1_  | _Dist. [Å] | _Structure 2_  |
|----|----------------|------------|----------------|
| 1  | B:PRO 14[ O ]  | 3.18       | L:ARG 48[ NH1] |
| 2  | B:PRO 14[ OXT] | 2.88       | L:ARG 48[ NH2] |
| 3  | B:PRO 14[ OXT] | 3.18       | L:ARG 48[ NH1] |

### Salt bridges XML

| ## | _Structure 1_  | _Dist. [Å] | _Structure 2_  |
|----|----------------|------------|----------------|
| 1  | B:PRO 14[ O ]  | 4.00       | L:ARG 48[ NH2] |
| 2  | B:PRO 14[ O ]  | 3.18       | L:ARG 48[ NH1] |
| 3  | B:PRO 14[ OXT] | 2.88       | L:ARG 48[ NH2] |
| 4  | B:PRO 14[ OXT] | 3.18       | L:ARG 48[ NH1] |

No disulfide bonds found

No covalent bonds found

D6

VH vs peptide

### Hydrogen bonds XML

| ## | _Structure 1_  | _Dist. [Å]_ | _Structure 2_    |
|----|----------------|-------------|------------------|
| 1  | M:GLY 11 [ N ] | 2.86        | H:ARG 30 [ O ]   |
| 2  | M:TYR 13 [ N ] | 3.00        | H:ASP 98 [ OD2 ] |
| 3  | M:GLU 5 [ O ]  | 2.69        | H:TYR 53 [ OH ]  |
| 4  | M:PHE 7 [ O ]  | 3.12        | H:ASN 51 [ ND2 ] |
| 5  | M:GLY 8 [ O ]  | 2.94        | H:THR 52 [ N ]   |
| 6  | M:GLY 11 [ O ] | 2.70        | H:ALA 97 [ N ]   |

No disulfide bonds found

No covalent bonds found

No salt bridges found

VL vs peptide

### Hydrogen bonds XML

| ## | _Structure 1_   | _Dist. [Å]_ | _Structure 2_  |
|----|-----------------|-------------|----------------|
| 1  | M:TYR 13 [ OH ] | 2.93        | L:SER 58 [ N ] |

No disulfide bonds found

No covalent bonds found

No salt bridges found
